# Supplementary material
Source: PubMed Central journal article supplement (PMC10203970)
Supplement: jamainternmed-e231253-s001.pdf [file jamainternmed-e231253-s001.pdf]

## Supplementary Online Content

Crandall CJ, Larson JC, Schousboe JT, et al. Race and ethnicity and fracture prediction among younger postmenopausal women in the Women's Health Initiative study. *JAMA Intern Med*. Published online May 22, 2023. doi:10.1001/jamainternmed.2023.1253

**eTable 1.** Characteristics of Study Participants at Baseline, by Race and Ethnicity

**eTable 2.** Area Under the Receiver Operating Characteristic Curve (AUC) Values for Fracture Risk Assessment (FRAX) and Osteoporosis Self-assessment Tool (OST) in Estimating 10-Year Risk of Major Osteoporotic Fractures (MOF)

**eTable 3.** Area Under the Receiver Operating Characteristic Curve (AUC) Values for Fracture Risk Assessment (FRAX) and Osteoporosis Self-assessment Tool (OST) in Predicting 10-Year Risk of Major Osteoporotic Fractures (MOF)—Sensitivity Analyses Excluding Clinical Spine Fracture

**eTable 4.** Observed and Expected Major Osteoporotic Fractures (MOF) by Quantile of Estimated Risk, by Race and Ethnicity

**eTable 5.** Area Under the Receiver Operating Characteristic Curve (AUC) Values for Fracture Risk Assessment (FRAX) and Osteoporosis Self-assessment Tool (OST) in Predicting 10-Year Risk of Major Osteoporotic Fractures (MOF)—Sensitivity Analyses

**eTable 6.** Area Under the Receiver Operating Characteristic (AUC) Curve Values for Fracture Risk Assessment (FRAX) and Osteoporosis Self-assessment Tool (OST) in Estimating Femoral Neck BMD T Score  $\leq -2.5$ —Sensitivity Analysis in BMD Subset

This supplementary material has been provided by the authors to give readers additional information about their work.

**eTable 1. Characteristics of Study Participants at Baseline, by Race and Ethnicity\***

| Baseline Characteristic                        | Race / Ethnicity  |                |                   |                |                      |                |                    |                | p-value <sup>†</sup> |
|------------------------------------------------|-------------------|----------------|-------------------|----------------|----------------------|----------------|--------------------|----------------|----------------------|
|                                                | Asian<br>(n=1486) |                | Black<br>(n=5927) |                | Hispanic<br>(n=2545) |                | White<br>(n=57211) |                |                      |
|                                                | n                 | % <sup>1</sup> | n                 | % <sup>1</sup> | n                    | % <sup>1</sup> | n                  | % <sup>1</sup> |                      |
| Age, years, mean (SD)                          | 57.3              | (4.2)          | 57.4              | (4.2)          | 56.9                 | (4.2)          | 57.9               | (4.1)          | <0.001               |
| Body mass index, kg/m <sup>2</sup> , mean (SD) | 25.3              | (4.8)          | 31.4              | (6.8)          | 29.0                 | (5.6)          | 27.7               | (5.9)          | <0.001               |
| < 25                                           | 825               | 55.5           | 922               | 15.6           | 620                  | 24.4           | 21392              | 37.4           |                      |
| 25 - < 30                                      | 462               | 31.1           | 1904              | 32.1           | 988                  | 38.8           | 19312              | 33.8           |                      |
| ≥ 30                                           | 193               | 13.0           | 3064              | 51.7           | 918                  | 36.1           | 16221              | 28.4           |                      |
| Physical function score, mean (SD)             | 88.5              | (14.9)         | 79.0              | (22.4)         | 82.9                 | (20.6)         | 85.9               | (16.9)         | <0.001               |
| Smoking                                        |                   |                |                   |                |                      |                |                    |                | <0.001               |
| Never                                          | 1043              | 70.2           | 2832              | 47.8           | 1547                 | 60.8           | 27458              | 48.0           |                      |
| Past                                           | 363               | 24.4           | 2304              | 38.9           | 788                  | 31.0           | 25214              | 44.1           |                      |
| Current                                        | 73                | 4.9            | 702               | 11.8           | 176                  | 6.9            | 4011               | 7.0            |                      |
| Alcohol Use                                    |                   |                |                   |                |                      |                |                    |                | <0.001               |
| Never                                          | 428               | 28.8           | 877               | 14.8           | 432                  | 17.0           | 4053               | 7.1            |                      |
| Past                                           | 308               | 20.7           | 1783              | 30.1           | 504                  | 19.8           | 8460               | 14.8           |                      |
| Current (≥ 1 drink/month)                      | 746               | 50.2           | 3198              | 54.0           | 1577                 | 62.0           | 44420              | 77.6           |                      |
| Hormone therapy use <sup>‡</sup>               | 880               | 59.2           | 2324              | 39.2           | 1283                 | 50.4           | 32989              | 57.7           | <0.001               |
| Daily oral glucocorticoid use <sup>§</sup>     | 2                 | 0.1            | 37                | 0.6            | 7                    | 0.3            | 147                | 0.3            | <0.001               |
| Falls in the Past Year                         |                   |                |                   |                |                      |                |                    |                | <0.001               |
| 0                                              | 1149              | 77.3           | 4017              | 67.8           | 1615                 | 63.5           | 35871              | 62.7           |                      |
| 1                                              | 224               | 15.1           | 1036              | 17.5           | 457                  | 18.0           | 11045              | 19.3           |                      |
| 2                                              | 59                | 4.0            | 410               | 6.9            | 181                  | 7.1            | 4670               | 8.2            |                      |
| ≥3                                             | 28                | 1.9            | 173               | 2.9            | 109                  | 4.3            | 2511               | 4.4            |                      |
| History of fracture ≥ age 55                   |                   |                |                   |                |                      |                |                    |                | <0.001               |

\* Missing data: BMI, n=348; physical function, n=838; smoking, n=658; alcohol, n=383; falls in the past year, n=3614; history of fracture ≥ 55, n=3166; parental history of hip fracture, n=2683; early menopause, n=3651; rheumatoid arthritis, n=2179; malabsorption, n=2471; liver disease, n=2; emphysema, n=5061

<sup>†</sup> p-value comparing demographics by race/ethnicity groups from t-tests for continuous demographic variables and Chi-square tests for categorical demographic variables.

<sup>‡</sup> Hormone use incorporates both a participant's self-report status at baseline as well as her intervention assignment in the Women's Health Initiative Hormone Therapy trial. Women assigned to active hormone therapy intervention were categorized as 'Yes' for hormone therapy use while women assigned to placebo were categorized as 'No'. Women not in the Hormone Therapy trial were assigned their baseline self-report hormone use.

<sup>§</sup> Glucocorticoid use defined as ≥ 3 months of oral daily use of ≥ 5 mg prednisone or equivalent

| Baseline Characteristic          | Race / Ethnicity  |                |                   |                |                      |                |                    |                | p-value† |
|----------------------------------|-------------------|----------------|-------------------|----------------|----------------------|----------------|--------------------|----------------|----------|
|                                  | Asian<br>(n=1486) |                | Black<br>(n=5927) |                | Hispanic<br>(n=2545) |                | White<br>(n=57211) |                |          |
|                                  | n                 | % <sup>1</sup> | n                 | % <sup>1</sup> | n                    | % <sup>1</sup> | n                  | % <sup>1</sup> |          |
| Yes                              | 49                | 3.3            | 153               | 2.6            | 79                   | 3.1            | 2527               | 4.4            |          |
| No                               | 968               | 65.1           | 3838              | 64.8           | 1473                 | 57.9           | 38867              | 67.9           |          |
| Not Applicable (<55 years old)   | 441               | 29.7           | 1683              | 28.4           | 849                  | 33.4           | 13076              | 22.9           |          |
| Parental History of Hip Fracture | 147               | 9.9            | 283               | 4.8            | 209                  | 8.2            | 7067               | 12.4           | <0.001   |
| Early menopause (<45 years old)  | 241               | 16.2           | 1696              | 28.6           | 515                  | 20.2           | 11005              | 19.2           | <0.001   |
| History of rheumatoid arthritis  | 60                | 4.0            | 384               | 6.5            | 119                  | 4.7            | 1915               | 3.3            | <0.001   |
| History of malabsorption*        | 0                 | 0.0            | 20                | 0.3            | 13                   | 0.5            | 160                | 0.3            | <0.001   |
| History of liver disease         | 30                | 2.0            | 82                | 1.4            | 48                   | 1.9            | 1363               | 2.4            | <0.001   |
| History of emphysema             | 20                | 1.3            | 187               | 3.2            | 57                   | 2.2            | 1457               | 2.5            | <0.001   |
| FRAX predicted 10-year risk      | 4.1               | (2.1)          | 2.8               | (1.3)          | 3.7                  | (1.9)          | 7.7                | (4.0)          | <0.001   |
| < 8.4                            | 1403              | 94.4           | 5899              | 99.5           | 2458                 | 96.6           | 41878              | 73.2           |          |
| ≥ 8.4                            | 83                | 5.6            | 28                | 0.5            | 87                   | 3.4            | 15333              | 26.8           |          |
| OST osteoporosis risk            | 0.82              | (2.5)          | 4.9               | (3.9)          | 2.8                  | (3.1)          | 2.9                | (3.3)          | <0.001   |
| < 2                              | 1083              | 72.9           | 1133              | 19.1           | 1045                 | 41.1           | 22940              | 40.1           |          |
| ≥ 2                              | 403               | 27.1           | 4794              | 80.9           | 1500                 | 58.9           | 34271              | 59.9           |          |

\* Self-report of special diet prescribed for malabsorption, celiac sprue, ulcerative colitis, or Crohn's disease

**eTable 2.** Area Under the Receiver Operating Characteristic Curve (AUC) Values for Fracture Risk Assessment (FRAX) and Osteoporosis Self-assessment Tool (OST) in Estimating 10-Year Risk of Major Osteoporotic Fractures (MOF)\*

| Race / Ethnicity | n     | Events | FRAX              | OST               |
|------------------|-------|--------|-------------------|-------------------|
|                  |       |        | AUC (95% CI) †    | AUC (95% CI)      |
| All Participants | 67169 | 5594   | 0.59 (0.59, 0.60) | 0.55 (0.54, 0.56) |
| Asian            | 1486  | 79     | 0.65 (0.58, 0.71) | 0.62 (0.56, 0.69) |
| Black            | 5927  | 275    | 0.55 (0.52, 0.59) | 0.53 (0.50, 0.57) |
| Hispanic         | 2545  | 204    | 0.61 (0.56, 0.65) | 0.58 (0.54, 0.62) |
| White            | 57211 | 5036   | 0.59 (0.58, 0.59) | 0.55 (0.54, 0.56) |

\* All models are adjusted for current hormone therapy use (yes/no) and the Calcium plus Vitamin D Trial intervention assignment (active, placebo, not randomized).

† p-values for AUC comparisons are as follows.

FRAX: Asian vs. Black, p=0.01; Asian vs. Hispanic, p=0.31; Asian vs. White, p=0.08; Black vs. Hispanic, p=0.06; Black vs. White, p=0.06; Hispanic vs. White, p=0.39.

OST: Asian vs. Black, p=0.02; Asian vs. Hispanic, p=0.27; Asian vs. White, p=0.04; Black vs. Hispanic, p=0.12; Black vs. White, p=0.34; Hispanic vs. White, p=0.24.

FRAX vs. OST: All Participants, p<0.001; Asian, p=0.59; Black, p=0.50; Hispanic, p=0.35; White, p<0.001;

p-values from a Chi-square statistic on 1 degree of freedom testing the difference between each paired group.

**eTable 3.** Area Under the Receiver Operating Characteristic Curve (AUC) Values for Fracture Risk Assessment (FRAX) and Osteoporosis Self-assessment Tool (OST) in Predicting 10-Year Risk of Major Osteoporotic Fractures (MOF)— Sensitivity Analyses Excluding Clinical Spine Fracture\*

|                         |          |               | <b>FRAX</b>           | <b>OST</b>          |
|-------------------------|----------|---------------|-----------------------|---------------------|
| <b>Race / Ethnicity</b> | <b>n</b> | <b>Events</b> | <b>AUC (95% CI) †</b> | <b>AUC (95% CI)</b> |
| All Participants        | 66951    | 4553          | 0.59 (0.58, 0.60)     | 0.55 (0.54, 0.56)   |
| Asian                   | 1482     | 61            | 0.67 (0.60, 0.75)     | 0.64 (0.57, 0.72)   |
| Black                   | 5911     | 238           | 0.55 (0.51, 0.59)     | 0.52 (0.49, 0.56)   |
| Hispanic                | 2537     | 166           | 0.60 (0.56, 0.65)     | 0.59 (0.55, 0.63)   |
| White                   | 57021    | 4088          | 0.59 (0.58, 0.60)     | 0.56 (0.55, 0.57)   |

---

\* All models are adjusted for current hormone therapy use (yes/no) and the Calcium plus Vitamin D Trial intervention assignment (active, placebo, not randomized). In this table, the MOF outcome includes hip, forearm, and shoulder fractures.

**eTable 4.** Observed and Expected Major Osteoporotic Fractures (MOF) by Quintile of Estimated Risk, by Race and Ethnicity

|                  |                    | Major Osteoporotic Fracture |                  |       |            |       |       |       |            |
|------------------|--------------------|-----------------------------|------------------|-------|------------|-------|-------|-------|------------|
|                  |                    | FRAX                        |                  |       |            | OST   |       |       |            |
| Race / Ethnicity | Quintile           | n                           | Obs <sup>*</sup> | Pred  | Obs / Pred | n     | Obs   | Pred  | Obs / Pred |
| All Participants | 1                  | 13436                       | 0.055            | 0.058 | 0.95       | 13416 | 0.073 | 0.068 | 1.08       |
|                  | 2                  | 13441                       | 0.068            | 0.068 | 1.00       | 12128 | 0.072 | 0.073 | 0.99       |
|                  | 3                  | 13422                       | 0.073            | 0.077 | 0.95       | 14903 | 0.073 | 0.077 | 0.94       |
|                  | 4                  | 13438                       | 0.096            | 0.090 | 1.06       | 12904 | 0.093 | 0.096 | 0.96       |
|                  | 5                  | 13432                       | 0.124            | 0.123 | 1.01       | 13818 | 0.106 | 0.101 | 1.05       |
|                  | Total <sup>†</sup> |                             | 67169            | 0.083 | 0.083      | 1.00  | 67169 | 0.083 | 0.083      |
| Asian            | 1                  | 295                         | 0.031            | 0.025 | 1.20       | 293   | 0.031 | 0.026 | 1.18       |
|                  | 2                  | 301                         | 0.033            | 0.038 | 0.88       | 274   | 0.040 | 0.042 | 0.96       |
|                  | 3                  | 296                         | 0.041            | 0.045 | 0.90       | 283   | 0.039 | 0.048 | 0.81       |
|                  | 4                  | 298                         | 0.054            | 0.063 | 0.85       | 314   | 0.067 | 0.059 | 1.14       |
|                  | 5                  | 296                         | 0.108            | 0.094 | 1.15       | 322   | 0.084 | 0.087 | 0.97       |
|                  | Total              |                             | 1486             | 0.053 | 0.053      | 1.00  | 1486  | 0.053 | 0.053      |
| Black            | 1                  | 1186                        | 0.036            | 0.036 | 1.00       | 1184  | 0.036 | 0.038 | 0.97       |
|                  | 2                  | 1188                        | 0.042            | 0.043 | 0.98       | 1215  | 0.044 | 0.044 | 1.02       |
|                  | 3                  | 1183                        | 0.044            | 0.048 | 0.92       | 1103  | 0.047 | 0.050 | 0.95       |
|                  | 4                  | 1186                        | 0.050            | 0.050 | 1.00       | 1220  | 0.051 | 0.050 | 1.01       |
|                  | 5                  | 1184                        | 0.060            | 0.055 | 1.08       | 1205  | 0.053 | 0.051 | 1.04       |
|                  | Total              |                             | 5927             | 0.046 | 0.046      | 1.00  | 5927  | 0.046 | 0.046      |
| Hispanic         | 1                  | 508                         | 0.053            | 0.048 | 1.10       | 480   | 0.056 | 0.055 | 1.02       |
|                  | 2                  | 510                         | 0.053            | 0.061 | 0.87       | 544   | 0.057 | 0.064 | 0.89       |
|                  | 3                  | 509                         | 0.073            | 0.075 | 0.97       | 520   | 0.085 | 0.075 | 1.13       |
|                  | 4                  | 509                         | 0.092            | 0.092 | 1.00       | 521   | 0.100 | 0.101 | 0.99       |
|                  | 5                  | 509                         | 0.130            | 0.125 | 1.04       | 480   | 0.104 | 0.107 | 0.98       |
|                  | Total              |                             | 2545             | 0.080 | 0.080      | 1.00  | 2545  | 0.080 | 0.080      |
| White            | 1                  | 11448                       | 0.059            | 0.063 | 0.95       | 10783 | 0.073 | 0.072 | 1.02       |
|                  | 2                  | 11435                       | 0.072            | 0.070 | 1.03       | 12691 | 0.071 | 0.076 | 0.94       |
|                  | 3                  | 11461                       | 0.082            | 0.083 | 0.98       | 10902 | 0.083 | 0.079 | 1.04       |
|                  | 4                  | 11430                       | 0.099            | 0.097 | 1.02       | 12285 | 0.108 | 0.105 | 1.02       |
|                  | 5                  | 11437                       | 0.128            | 0.127 | 1.01       | 10550 | 0.106 | 0.108 | 0.98       |
|                  | Total              |                             | 57211            | 0.088 | 0.088      | 1.00  | 57211 | 0.088 | 0.088      |

<sup>\*</sup> Obs: observed fractures; Pred: predicted fractures; FRAX: Fracture Risk Assessment Tool; OST: Osteoporosis Self-Assessment Tool

<sup>†</sup> "Total" obs/pred ratio based on full model sample will always be 1

**eTable 5. Area Under the Receiver Operating Characteristic Curve (AUC) Values for Fracture Risk Assessment (FRAX) and Osteoporosis Self-assessment Tool (OST) in Predicting 10-Year Risk of Major Osteoporotic Fractures (MOF)—Sensitivity Analyses\***

|                                                                                  | Race / Ethnicity | n     | Events | FRAX              | OST               |
|----------------------------------------------------------------------------------|------------------|-------|--------|-------------------|-------------------|
|                                                                                  |                  |       |        | AUC (95% CI)      | AUC (95% CI)      |
| Original Results<br>(n=67169)                                                    | All Participants | 67169 | 5594   | 0.59 (0.59, 0.60) | 0.55 (0.54, 0.56) |
|                                                                                  | Asian            | 1486  | 79     | 0.65 (0.58, 0.71) | 0.62 (0.56, 0.69) |
|                                                                                  | Black            | 5927  | 275    | 0.55 (0.52, 0.59) | 0.53 (0.50, 0.57) |
|                                                                                  | Hispanic         | 2545  | 204    | 0.61 (0.56, 0.65) | 0.58 (0.54, 0.62) |
|                                                                                  | White            | 57211 | 5036   | 0.59 (0.58, 0.59) | 0.55 (0.54, 0.56) |
| Never HT Users <sup>†</sup><br>(n=21313)                                         | All Participants | 21313 | 2075   | 0.59 (0.58, 0.60) | 0.53 (0.51, 0.54) |
|                                                                                  | Asian            | 442   | 30     | 0.69 (0.59, 0.78) | 0.64 (0.54, 0.74) |
|                                                                                  | Black            | 2828  | 142    | 0.55 (0.51, 0.60) | 0.53 (0.49, 0.58) |
|                                                                                  | Hispanic         | 969   | 94     | 0.60 (0.54, 0.66) | 0.53 (0.47, 0.59) |
|                                                                                  | White            | 17074 | 1809   | 0.57 (0.55, 0.58) | 0.51 (0.50, 0.53) |
| Excluding<br>users of osteoporosis medication during follow-up<br>‡<br>(n=60135) | All Participants | 60135 | 4677   | 0.59 (0.58, 0.60) | 0.55 (0.54, 0.56) |
|                                                                                  | Asian            | 1261  | 61     | 0.62 (0.54, 0.69) | 0.59 (0.52, 0.67) |
|                                                                                  | Black            | 5677  | 256    | 0.56 (0.52, 0.59) | 0.54 (0.51, 0.58) |
|                                                                                  | Hispanic         | 2351  | 176    | 0.60 (0.55, 0.64) | 0.58 (0.54, 0.63) |
|                                                                                  | White            | 50846 | 4184   | 0.58 (0.57, 0.59) | 0.55 (0.55, 0.56) |

\* All models are adjusted for current hormone therapy use (yes/no) and the Calcium plus Vitamin D Trial intervention assignment (active, placebo, not randomized).

† Participants who self-reported never using hormone therapy (HT) at Women's Health Initiative study enrollment and were then either randomized to placebo HT or not enrolled in the HT trial.

‡ Participants self-reporting exclusion criteria osteoporosis medications at Year 1, 3, 6, or 9 medication visits.

**eTable 6.** Area Under the Receiver Operating Characteristic (AUC) Curve Values for Fracture Risk Assessment (FRAX) and Osteoporosis Self-assessment Tool (OST) in Estimating Femoral Neck BMD T Score  $\leq -2.5$ —Sensitivity Analysis in BMD Subset\*

| Sensitivity Analysis                                | Race / Ethnicity | n    | Events | FRAX                           | OST                            |
|-----------------------------------------------------|------------------|------|--------|--------------------------------|--------------------------------|
|                                                     |                  |      |        | AUC (95% CI)                   | AUC (95% CI)                   |
| Original Results                                    | All Participants | 4607 | 235    | 0.72 (0.68, 0.75)              | 0.83 (0.80, 0.85)              |
|                                                     | Black            | 628  | 14     | 0.74 (0.61, 0.87)              | 0.85 (0.74, 0.96)              |
|                                                     | Hispanic         | 320  | 14     | 0.74 (0.60, 0.88)              | 0.79 (0.65, 0.93)              |
|                                                     | White            | 3642 | 206    | 0.72 (0.68, 0.75)              | 0.82 (0.80, 0.85)              |
| Never HT Users <sup>†</sup>                         | All Participants | 1567 | 110    | 0.73 (0.68, 0.77)              | 0.82 (0.78, 0.85)              |
|                                                     | Black            | 278  | 7      | 0.78 (0.63, 0.94) <sup>‡</sup> | 0.86 (0.68, 1.00) <sup>‡</sup> |
|                                                     | Hispanic         | 132  | 10     | 0.76 (0.62, 0.90)              | 0.85 (0.73, 0.96)              |
|                                                     | White            | 1154 | 93     | 0.73 (0.68, 0.78)              | 0.80 (0.76, 0.84)              |
| Excluding follow-up OP users, Method A <sup>§</sup> | All Participants | 4185 | 163    | 0.71 (0.67, 0.75)              | 0.83 (0.80, 0.85)              |
|                                                     | Black            | 615  | 14     | 0.75 (0.62, 0.75)              | 0.85 (0.74, 0.96)              |
|                                                     | Hispanic         | 293  | 10     | 0.73 (0.57, 0.88)              | 0.81 (0.67, 0.96)              |
|                                                     | White            | 3262 | 138    | 0.72 (0.67, 0.76)              | 0.82 (0.79, 0.85)              |

\* All models are adjusted for current hormone therapy use (yes/no) and the Calcium plus Vitamin D Trial intervention assignment (active, placebo, not randomized). Because there was only one Asian participant who had femoral neck BMD  $\leq -2.5$ , we do not display results for Asian participants.

<sup>†</sup> Participants who self-reported never using hormone therapy (HT) at Women's Health Initiative study enrollment and were then either randomized to placebo HT or not enrolled in the HT trial.

<sup>‡</sup> Questionable model fit

<sup>§</sup> Participants self-reporting exclusion criteria Osteoporosis medications at Year 1, 3, 6, or 9 medication visits.
