# Supplementary material
Source: PubMed Central journal article supplement (PMC10203970)
Supplement: jamainternmed-e231253-s002.pdf [file jamainternmed-e231253-s002.pdf]

## Data Sharing Statement

Crandall. Race and Ethnicity and Fracture Prediction Among Younger Postmenopausal Women in the Women's Health Initiative Study. *JAMA Intern Med.* Published May 22, 2023. doi:10.1001/jamainternmed.2023.1253

### Data

**Data available:** Yes

**Data types:** Deidentified participant data

**How to access data:** National Heart, Lung, and Blood Institute at <https://biolincc.nhlbi.nih.gov/home/>

**When available:** With publication

### Supporting Documents

**Document types:** None

### Additional Information

**Who can access the data:** publicly available at National Heart, Lung, and Blood Institute at <https://biolincc.nhlbi.nih.gov/home/>

**Types of analyses:** all data from current study are publicly available at National Heart, Lung, and Blood Institute at <https://biolincc.nhlbi.nih.gov/home/>

**Mechanisms of data availability:** National Heart, Lung, and Blood Institute at <https://biolincc.nhlbi.nih.gov/home/>
